# Supplementary material for: Effect of Collapsed Duplications on Diversity Estimates: What to Expect
Source: PubMed Central journal article supplement (PMC6239678; doi:10.1093/gbe/evy223), 2018-10-26
Supplement: evy223_supp.pdf [file evy223_supp.pdf]

## Supplementary Material

### Effect of collapsed duplications on diversity estimates: what to expect

Diego A. Hartasánchez, Marina Brasó-Vives, Jose Maria Heredia-Genestar, Marc Pybus, Arcadi Navarro

**Table S1.** Selected set of summary statistics applied to our data.

| Test statistic       | Type                 | Reference                   | Package      |
|----------------------|----------------------|-----------------------------|--------------|
| $\pi$                | Diversity estimator  | Nei and Li, 1979            | Evolboosting |
| Watterson's $\theta$ | Diversity estimator  | Watterson, 1975             | Evolboosting |
| Tajima's D           | Neutrality statistic | Tajima, 1989                | PopGenome    |
| Fu and Li's D        | Neutrality statistic | Fu and Li, 1993             | PopGenome    |
| Fu and Li's F        | Neutrality statistic | Fu and Li, 1993             | PopGenome    |
| Fay and Wu's H       | Neutrality statistic | Fay and Wu, 2000            | PopGenome    |
| Zeng's E             | Neutrality statistic | Zeng et al., 2006           | PopGenome    |
| Li's MFDM            | Neutrality statistic | Li, 2011                    | Evolboosting |
| dh                   | Haplotype-based      | Nei, 1987                   | SSCosi       |
| iHS                  | Haplotype-based      | Voight <i>et al.</i> , 2006 | rehh         |

To calculate these statistics we used four programs: PopGenome (Pfeifer et al., 2014), Evolboosting (Lin et al., 2011), SSCosi (Ramírez-Soriano et al., 2008), and rehh (Gautier and Vitalis, 2011). Some of the statistics are implemented in several programs and results are largely reproducible between different software.

**Table S2.**

| Population | Region | Number | Av. length | Group | Av. num. SNVs | Av. pi  |         |
|------------|--------|--------|------------|-------|---------------|---------|---------|
| All        | All    | 153    | 18977.16   |       | 83.09         | 0.00106 |         |
|            | 5'     |        |            |       |               |         |         |
|            |        |        |            | CNr   |               |         | 73.70   |
|            |        |        |            |       | CN+           | 77.02   | 0.00127 |
|            | CNV    |        |            |       |               |         |         |
|            |        |        |            | CNr   |               |         |         |
|            |        |        |            |       | CN+           | 110.10  | 0.00108 |
|            | 3'     |        |            |       |               |         |         |
|            |        |        |            |       | CNr           |         |         |
|            |        |        |            |       | CN+           | 70.56   | 0.00137 |
| CEU        | All    | 51     | 17501.38   |       | 72.98         | 0.00108 |         |
|            | 5'     |        |            |       |               |         |         |
|            |        |        |            | CNr   |               |         | 64.67   |
|            |        |        |            |       | CN+           | 71.74   | 0.00118 |
|            | CNV    |        |            |       |               |         |         |
|            |        |        |            | CNr   |               |         |         |
|            |        |        |            |       | CN+           | 96.67   | 0.00132 |
|            | 3'     |        |            |       |               |         |         |
|            |        |        |            |       | CNr           |         |         |
|            |        |        |            |       | CN+           | 67.56   | 0.00102 |
| CHB        | All    | 63     | 20744.16   |       | 61.85         | 0.00080 |         |
|            | 5'     |        |            |       |               |         |         |
|            |        |        |            | CNr   |               |         | 54.92   |
|            |        |        |            |       | CN+           | 57.30   | 0.00086 |
|            | CNV    |        |            |       |               |         |         |
|            |        |        |            | CNr   |               |         |         |
|            |        |        |            |       | CN+           | 77.87   | 0.00092 |
|            | 3'     |        |            |       |               |         |         |
|            |        |        |            |       | CNr           |         |         |
|            |        |        |            |       | CN+           | 55.11   | 0.00073 |
| YRI        | All    | 39     | 17922.92   |       | 117.06        | 0.00137 |         |
|            | 5'     |        |            |       |               |         |         |
|            |        |        |            | CNr   |               |         | 103.80  |
|            |        |        |            |       | CN+           | 105.41  | 0.00127 |
|            | CNV    |        |            |       |               |         |         |
|            |        |        |            | CNr   |               |         |         |
|            |        |        |            |       | CN+           | 160.18  | 0.00166 |
|            | 3'     |        |            |       |               |         |         |
|            |        |        |            |       | CNr           |         |         |
|            |        |        |            |       | CN+           | 91.94   | 0.00124 |

**Figure S1.** Average values for our complete set of summary statistics from 1,000 SeDuS simulations. Values are shown for single-copy, duplicated and collapsed for a range of crossover rates ( $R = 1, 10, 100$ ) and IGC rates ( $C = 0.5, 1, 5$ ).

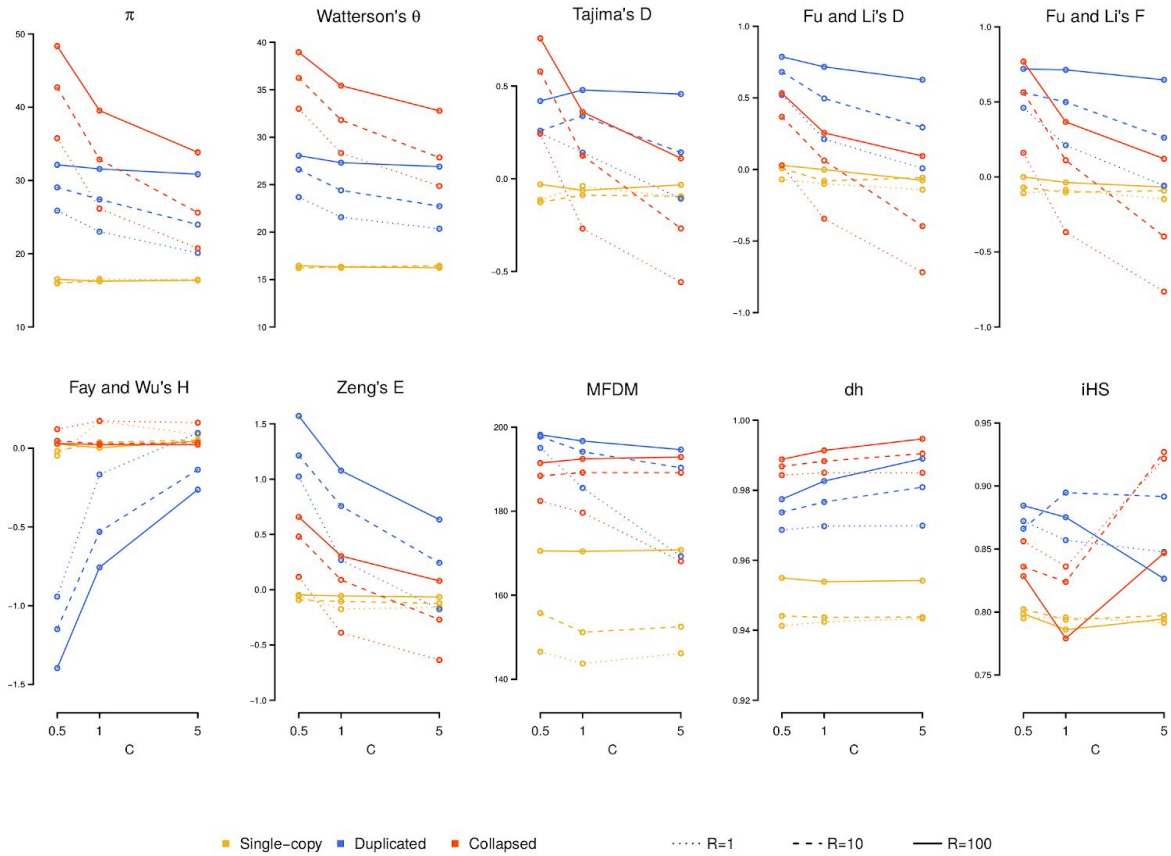

**Figure S2.** Distribution of values for our complete set of summary statistics from 1000 SeDuS simulations. Density plots are shown for single-copy, duplicated and collapsed for a crossover rate  $R = 10$  and a range of IGC rates ( $C = 0.5, 1, 5$ ).

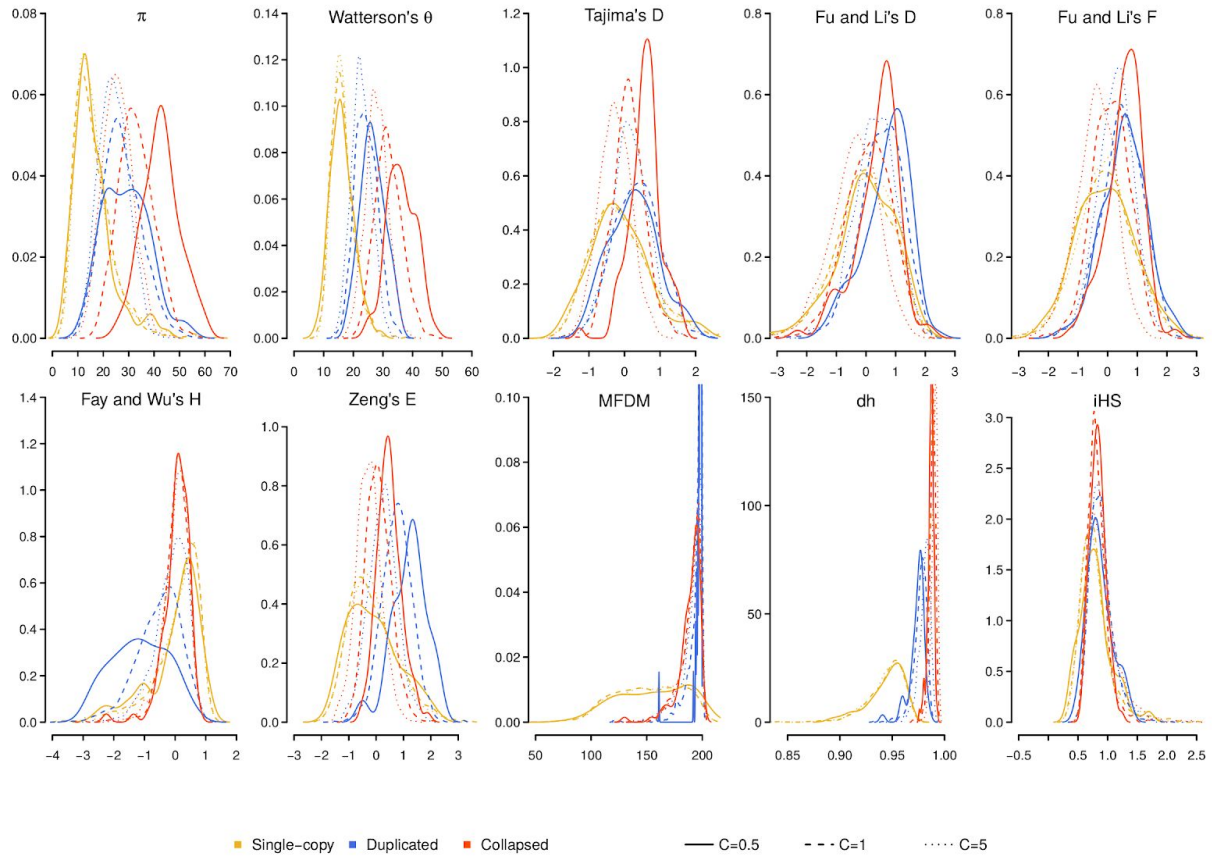

**Figure S3.** Boxplot comparison between simulation results from MSMS (complete sweep, incomplete sweep, balancing selection and neutrality) and SeDuS (single-copy, duplicated, collapsed) with low ( $C = 0.5$ ) and high ( $C = 5$ ) values of IGC rates and CO rate of  $R = 10$  for our complete set of summary statistics. The length of the boxplot whiskers are 1.5 times the inter-quantile range.

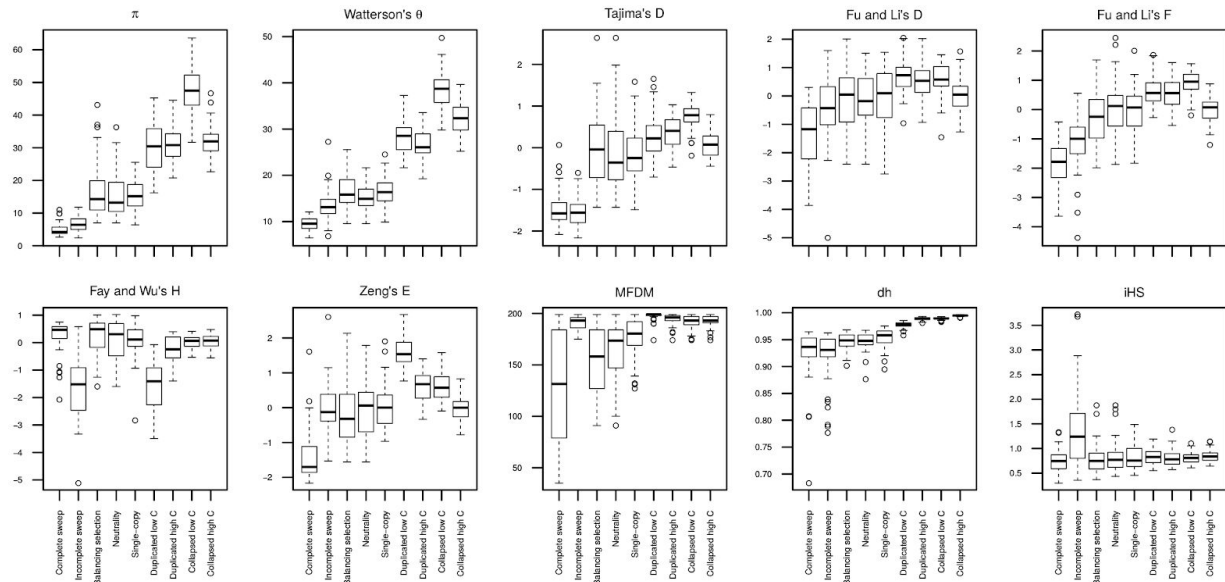

**Figure S4.** Violin plots show the distribution of differences in average pairwise differences,  $\pi$ , between CNr and CN+ groups (CN+ minus CNr) for the CNV region (blue), and for the 5' (yellow) and 3' (green) regions flanking each CNV, for CEU (top), CHB (middle) and YRI (bottom). Black points indicate the median from each distribution. Mean increases for the CNV region are 27.6% (CEU), 14.4% (CHB), and 9.9% (YRI) with paired t-test p-values (represented by asterisks) of 0.038, 0.014, and 0.015, respectively. Differences for the 5' and 3' regions are non significant for all three populations.

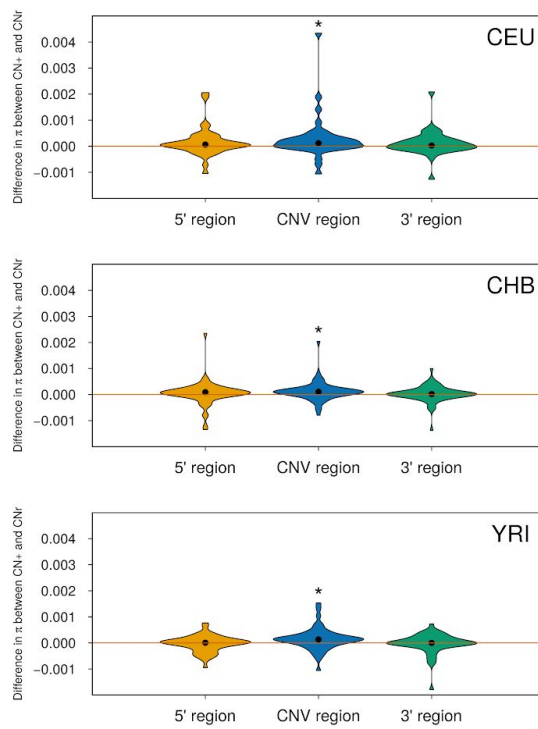

**Figure S5.** Fraction of SNVs within each CNV that fail a Hardy-Weinberg Equilibrium test with a p-value smaller than 0.05, for the CNr and CN+ groups independently, for CEU (left), CHB (middle), and YRI (right). This fraction is higher for the CN+ than for the CNr group with strong statistical significance for all populations. Paired t test p-values were  $8.46 \times 10^{-5}$ ,  $7.39 \times 10^{-10}$ , and  $5.42 \times 10^{-5}$  for CEU, CHB, and YRI respectively.

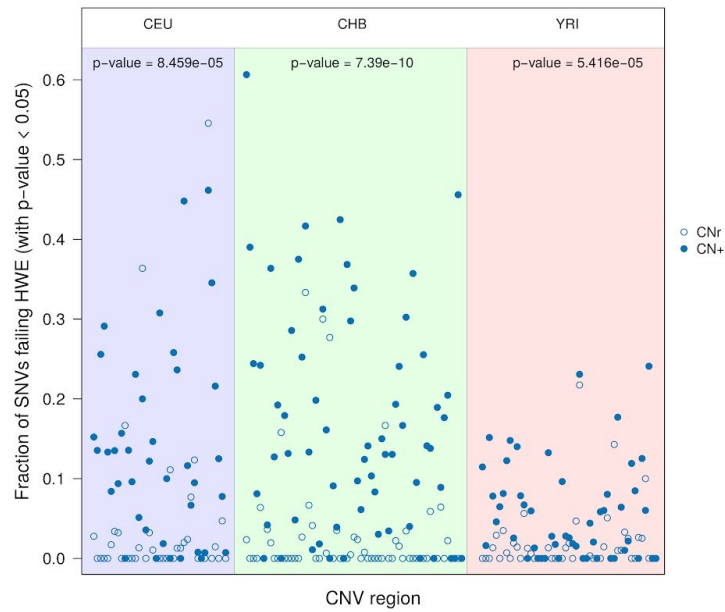

## **Additional references**

Fu YX, Li WH. 1993. Statistical tests of neutrality of mutations. *Genetics* 133:693–709.

Gautier M, Vitalis R. 2012. rehh: an R package to detect footprints of selection in genome-wide SNP data from haplotype structure. *Bioinformatics* 28:1176-1177.

Li H. 1993. A new test for detecting recent positive selection that is free from the confounding impacts of demography. *Mol. Biol. Evol.* 28:365-375.

Voight BF, Kudaravalli S, Wen X, Pritchard JK. 2006. A map of recent positive selection in the human genome. *PloS Biol.* 4:e72.

Watterson GA. 1975. On the number of segregating sites in genetical models without recombination. *Theor. Popul. Biol.* 7 256–276.

Zeng K, Fu Y, Shi S, Wu C. 2006. Statistical tests for detecting positive selection by utilizing high-frequency variants. *Genetics* 174:1431-1439.
